# Supplementary material for: Preparation and characterization of selenium enriched-Bifidobacterium longum DD98, and its repairing effects on antibiotic-induced intestinal dysbacteriosis in mice
Source: Royal Society of Chemistry journal article supplement (doi:10.1039/c9fo00960d), 2019-01-01
Supplement: c9fo00960d1.pdf [file c9fo00960d1.pdf]

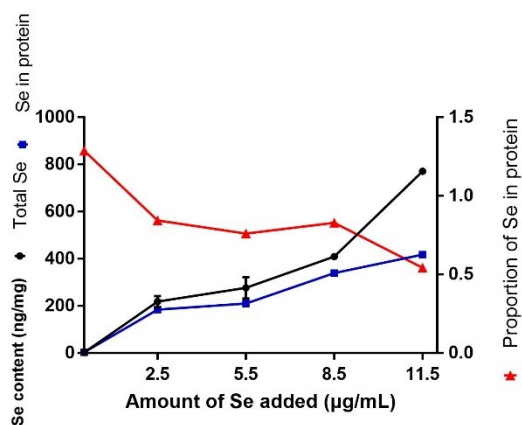

Fig. S1 Accumulation of total Se and Se in protein fraction by *B. longum* DD98 under different concentration of inorganic Se in medium

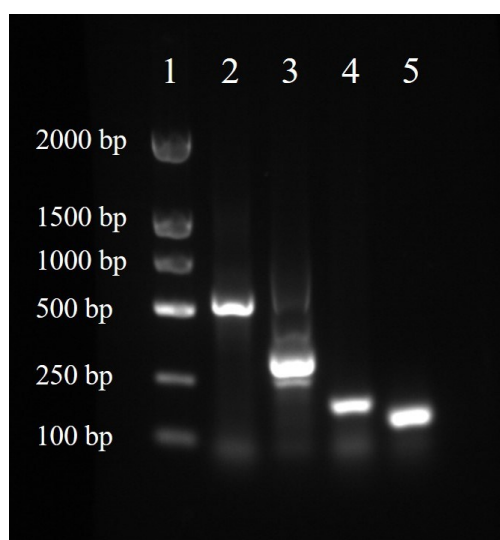

Fig. S2 Agarose gel (1%) electrophoresis image for specific DNA products of targeted bacteria (i.e., 1, marker; 2, Bifidobacterium; 3, Lactobacillus; 4, Enterobacter; 5, Enterococcus).

Table S1 PCR primers used for qPCR

| Target bacterial group | Primer   | Oligonucleotide sequence (5' → 3') | Product size (bp) | Annealing temperature (°C) | Reference                                             |
|------------------------|----------|------------------------------------|-------------------|----------------------------|-------------------------------------------------------|
| <i>Bifidobacterium</i> | Bifid-F  | CTCCTGGAAACGGGTG<br>G              | 550               | 59.4                       | (Matsuki, Watanabe, Fujimoto, Takada, & Tanaka, 2004) |
|                        | Bifid-R  | GGTGTCTCTCCGATAT<br>CTAC           |                   |                            |                                                       |
| <i>Lactobacillus</i>   | Lac-F    | AGCAGTAGGGAATCTT<br>CCA            | 341               | 57.7                       | (Rinttila, Kassinen, Malinen, Krogius, & Palva, 2004) |
|                        | Lac-R    | CACCGCTACACATGGA<br>G              |                   |                            |                                                       |
| <i>Enterococcus</i>    | Enco-F   | CCCTTATTGTTAGTTGC<br>CATCATT       | 144               | 57.7                       | (Rinttila et al., 2004)                               |
|                        | Enco-R   | ACTCGTTGTACTIONCCCA<br>TTGT        |                   |                            |                                                       |
| <i>Enterobacter</i>    | Eco1457F | CATTGACGTTACCCGC<br>AGAAGAAGC      | 195               | 61.5                       | (Bartosch, Fite, Macfarlane, & McMurdo, 2004)         |
|                        | Eco1652R | CTCTACGAGACTCAAG<br>CTTGC          |                   |                            |                                                       |

Table S2 Amplification slopes, efficiencies, and correlation coefficients of qPCR assays for studied intestinal bacterial groups

| Target bacterial group | Slope          | Amplification efficiency (%) | Correlation coefficient |
|------------------------|----------------|------------------------------|-------------------------|
| <i>Bifidobacterium</i> | -3.395 ± 0.061 | 97.06                        | 0.999                   |
| <i>Lactobacillus</i>   | -3.416 ± 0.090 | 96.22                        | 0.998                   |
| <i>Enterobacter</i>    | -3.461 ± 0.035 | 94.49                        | 0.999                   |
| <i>Enterococcus</i>    | -3.315 ± 0.025 | 100.3                        | 0.999                   |
